# Supplementary material for: Rapid recognition and quantitative analysis of niobium minerals by scanning electron microscopy/energy dispersive X-ray spectroscopy
Source: Royal Society of Chemistry journal article supplement (doi:10.1039/d2ja00274d), 2022-01-01
Supplement: d2ja00274d1.pdf [file d2ja00274d1.pdf]

## Supplementary Information

### **Rapid Recognition and Quantitative Technique of Niobium Minerals by Scanning Electron Microscopy/Energy Dispersive X-ray Spectroscopy**

Jiangyan Yuan<sup>1\*</sup>, Xiaochun Li<sup>3</sup>, Yi Chen<sup>1, 2\*</sup>, Zhengguang Zhang<sup>4</sup>, Xiaoguang Li<sup>1</sup>, Sridhar Komarneni<sup>5</sup>

<sup>1</sup> State Key Laboratory of Lithospheric Evolution, Institute of Geology and Geophysics, Chinese Academy of Sciences, Beijing 100029, P. R. China

<sup>2</sup> College of Earth and Planetary Sciences, University of Chinese Academy of Sciences, Beijing 100049, P. R. China

<sup>3</sup> Key Laboratory of Mineral Resources, Institute of Geology and Geophysics, Chinese Academy of Sciences, Beijing 100029, P. R. China

<sup>4</sup> General Prospecting Institute of China National Administration of Coal Geology, Beijing 100039, P. R. China

<sup>5</sup> Department of Ecosystem Science and Management and Materials Research Institute, 204 Energy and the Environment Laboratory, The Pennsylvania State University, University Park, PA 16802, USA

**Corresponding Author Email:** yuanjy@mail.iggcas.ac.cn & chenyi@mail.iggcas.ac.cn

**Table S1 Optimum conditions of rapid recognition experiments based on EDS**

| <b>Resolution</b> | <b>Single filed magnification</b> | <b>Min grain size</b> | <b>Step pixels</b> | <b>Image dwell time(us)</b> | <b>Second image dwell (us)</b> | <b>Fast EDS acquisition time (s)</b> | <b>Total time(min)</b> |
|-------------------|-----------------------------------|-----------------------|--------------------|-----------------------------|--------------------------------|--------------------------------------|------------------------|
| 4096              | □60                               | 5                     | 96                 | 5                           | 0                              | 0.10                                 | 113                    |
| 4096              | □60                               | 5                     | 96                 | 5                           | 0                              | 0.07                                 | 96                     |
| 4096              | □60                               | 5                     | 96                 | 5                           | 0                              | 0.05                                 | 94                     |
| 4096              | □60                               | 5                     | 96                 | 5                           | 0                              | 0.03                                 | 88                     |
| 4096              | □60                               | 5                     | 96                 | 5                           | 0                              | 0.01                                 | 84                     |
| 1024              | ×60                               | 5                     | 6                  | 5                           | 0                              | 0.10                                 | 73                     |
| 2048              | ×60                               | 5                     | 24                 | 5                           | 0                              | 0.10                                 | 58                     |
| 8192              | ×60                               | 5                     | 384                | 5                           | 0                              | 0.10                                 | 262                    |
| 1024              | ×120                              | 5                     | 24                 | 5                           | 0                              | 0.10                                 | 87                     |
| 2048              | ×120                              | 5                     | 96                 | 5                           | 0                              | 0.10                                 | 100                    |
| 2048              | ×60                               | 5                     | 24                 | 5                           | 0                              | 0.03                                 | 41                     |
| 2048              | ×60                               | 5                     | 24                 | 3                           | 0                              | 0.03                                 | 37                     |
| 2048              | ×60                               | 5                     | 24                 | 1                           | 0                              | 0.03                                 | 33                     |
| 2048              | ×60                               | 5                     | 24                 | 1                           | 2                              | 0.03                                 | 34                     |
| 2048              | ×60                               | 5                     | 24                 | 1                           | 3                              | 0.03                                 | 35                     |
| 2048              | ×60                               | 5                     | 24                 | 1                           | 5                              | 0.03                                 | 37                     |
| 4096              | ×60                               | 3                     | 34                 | 1                           | 3                              | 0.03                                 | 99                     |
| 2048              | ×120                              | 3                     | 34                 | 1                           | 3                              | 0.03                                 | 101                    |
| 2048              | ×60                               | 7                     | 45                 | 1                           | 3                              | 0.03                                 | 24                     |
| 1024              | ×60                               | 7                     | 11                 | 1                           | 3                              | 0.03                                 | 25                     |
| 4096              | ×60                               | 7                     | 180                | 1                           | 3                              | 0.03                                 | 46                     |
| 4096              | ×60                               | 10                    | 368                | 1                           | 3                              | 0.03                                 | 35                     |
| 2048              | ×60                               | 10                    | 92                 | 1                           | 3                              | 0.03                                 | 16                     |
| 1024              | ×60                               | 10                    | 23                 | 1                           | 3                              | 0.03                                 | 15                     |
| 1024              | ×60                               | 15                    | 52                 | 1                           | 3                              | 0.03                                 | 8                      |
| 2048              | ×60                               | 15                    | 52                 | 1                           | 3                              | 0.03                                 | 13                     |

**Table S2** EDS results and reference values for standards

| □ Standards                                                          | Oxides                         | EDS results | Reference | SD   |
|----------------------------------------------------------------------|--------------------------------|-------------|-----------|------|
| □                                                                    | SrO                            | 13.01       | 13.15     | 0.07 |
| □ Sr <sub>0.5</sub> Ba <sub>0.5</sub> Nb <sub>2</sub> O <sub>6</sub> | BaO                            | 19.55       | 19.47     | 0.09 |
| □                                                                    | Nb <sub>2</sub> O <sub>5</sub> | 67.57       | 67.94     | 0.26 |
| □ KNbO <sub>3</sub>                                                  | K <sub>2</sub> O               | 25.74       | 25.89     | 0.11 |
| □                                                                    | Nb <sub>2</sub> O <sub>5</sub> | 75.23       | 74.10     | 0.43 |

**Table S3** EDS results and EPMA values for niobium minerals at the same locations of the slice sample

|            | □    | F    | Na <sub>2</sub> O | CaO   | TiO <sub>2</sub> | Nb <sub>2</sub> O <sub>5</sub> | Ce <sub>2</sub> O <sub>3</sub> | Nd <sub>2</sub> O <sub>3</sub> | FeO  | SrO  | BaO  | SiO <sub>2</sub> | Eu <sub>2</sub> O <sub>3</sub> | Y <sub>2</sub> O <sub>3</sub> |
|------------|------|------|-------------------|-------|------------------|--------------------------------|--------------------------------|--------------------------------|------|------|------|------------------|--------------------------------|-------------------------------|
| Pyrochlore | EDS  | 4.36 | 6.89              | 12.30 | 4.56             | 63.91                          | 4.04                           | 2.29                           | 1.02 | 0.16 | 0.47 | -                | -                              | -                             |
|            | EPMA | 4.67 | 7.21              | 12.14 | 4.59             | 63.91                          | 3.75                           | 2.88                           | 0.48 | 0.30 | 0.07 | -                | -                              | -                             |
| Aeschynite | EDS  | -    | -                 | 7.00  | 16.56            | 39.06                          | 2.35                           | 5.64                           | 4.09 | -    | -    | 4.97             | 0.70                           | 2.84                          |
|            | EMPA | -    | -                 | 6.84  | 16.67            | 39.11                          | 2.02                           | 5.62                           | 3.73 | -    | -    | 4.97             | 0.89                           | 2.48                          |

**Table S4** Quantitative analysis error requirement of SEM-EDS (GBT 25189-2010)

| Weight%           | Accepted RDEV/% |          |
|-------------------|-----------------|----------|
|                   | alloys          | minerals |
| wt% > 20%         | 2               | 5        |
| 3% ≤ wt% ≤ 20%    | 5               | 10       |
| 0.5% ≤ wt% ≤ 1%   | 15              | 20       |
| 0.5% ≤ wt% ≤ 1%   | 20              | 30       |
| 0.1% ≤ wt% ≤ 0.5% | 30              | 50       |

**Table S5** The eigenvalue and variance using PCA method based on the composition data of niobium minerals

| PC | Eigenvalue | % variance |
|----|------------|------------|
| 1  | 163.945    | 76.1090    |
| 2  | 27.5879    | 12.8070    |
| 3  | 10.1021    | 4.68980    |
| 4  | 4.52476    | 2.10060    |
| 5  | 3.41765    | 1.58660    |
| 6  | 1.69288    | 0.78590    |
| 7  | 0.94468    | 0.43856    |
| 8  | 0.70903    | 0.32916    |
| 9  | 0.65381    | 0.30352    |
| 10 | 0.39697    | 0.18429    |
| 11 | 0.34289    | 0.15918    |
| 12 | 0.25426    | 0.11804    |
| 13 | 0.22593    | 0.10489    |
| 14 | 0.20398    | 0.09470    |
| 15 | 0.12457    | 0.05783    |
| 16 | 0.10470    | 0.04861    |
| 17 | 0.06159    | 0.02859    |
| 18 | 0.04492    | 0.02086    |
| 19 | 0.03882    | 0.01802    |
| 20 | 0.02987    | 0.01387    |
| 21 | 0.00079    | 0.00037    |

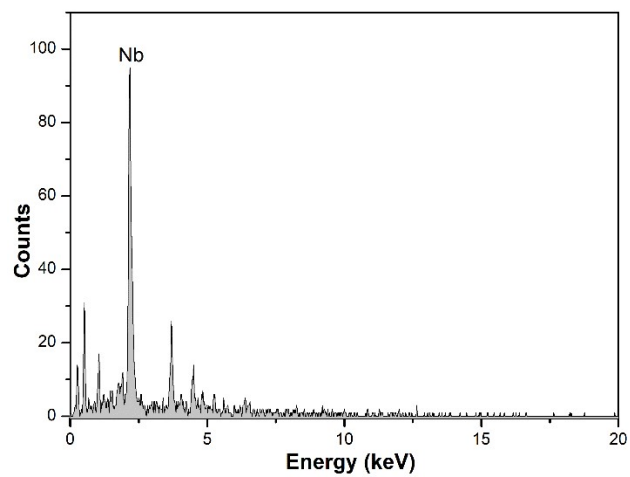

**Figure S1** The EDS spectrum of Nb-mineral obtained at the time of 0.03s
